# Supplementary material for: Pioneer and nonpioneer factor cooperation drives lineage specific chromatin opening
Source: PubMed Central journal article supplement (PMC6707328; doi:10.1038/s41467-019-11791-9), 2019-08-23
Supplement: 41467_2019_11791_MOESM2_ESM.pdf [file 41467_2019_11791_MOESM2_ESM.pdf]

## Reporting Summary

Nature Research wishes to improve the reproducibility of the work that we publish. This form provides structure for consistency and transparency in reporting. For further information on Nature Research policies, see [Authors & Referees](#) and the [Editorial Policy Checklist](#).

### Statistics

For all statistical analyses, confirm that the following items are present in the figure legend, table legend, main text, or Methods section.

n/a Confirmed

- |                                     |                                     |                                                                                                                                                                                                                                                            |
|-------------------------------------|-------------------------------------|------------------------------------------------------------------------------------------------------------------------------------------------------------------------------------------------------------------------------------------------------------|
| <input type="checkbox"/>            | <input checked="" type="checkbox"/> | The exact sample size ( $n$ ) for each experimental group/condition, given as a discrete number and unit of measurement                                                                                                                                    |
| <input type="checkbox"/>            | <input checked="" type="checkbox"/> | A statement on whether measurements were taken from distinct samples or whether the same sample was measured repeatedly                                                                                                                                    |
| <input type="checkbox"/>            | <input checked="" type="checkbox"/> | The statistical test(s) used AND whether they are one- or two-sided<br><i>Only common tests should be described solely by name; describe more complex techniques in the Methods section.</i>                                                               |
| <input checked="" type="checkbox"/> | <input type="checkbox"/>            | A description of all covariates tested                                                                                                                                                                                                                     |
| <input checked="" type="checkbox"/> | <input type="checkbox"/>            | A description of any assumptions or corrections, such as tests of normality and adjustment for multiple comparisons                                                                                                                                        |
| <input type="checkbox"/>            | <input checked="" type="checkbox"/> | A full description of the statistical parameters including central tendency (e.g. means) or other basic estimates (e.g. regression coefficient) AND variation (e.g. standard deviation) or associated estimates of uncertainty (e.g. confidence intervals) |
| <input type="checkbox"/>            | <input checked="" type="checkbox"/> | For null hypothesis testing, the test statistic (e.g. $F$ , $t$ , $r$ ) with confidence intervals, effect sizes, degrees of freedom and $P$ value noted<br><i>Give <math>P</math> values as exact values whenever suitable.</i>                            |
| <input checked="" type="checkbox"/> | <input type="checkbox"/>            | For Bayesian analysis, information on the choice of priors and Markov chain Monte Carlo settings                                                                                                                                                           |
| <input checked="" type="checkbox"/> | <input type="checkbox"/>            | For hierarchical and complex designs, identification of the appropriate level for tests and full reporting of outcomes                                                                                                                                     |
| <input type="checkbox"/>            | <input checked="" type="checkbox"/> | Estimates of effect sizes (e.g. Cohen's $d$ , Pearson's $r$ ), indicating how they were calculated                                                                                                                                                         |

*Our web collection on [statistics for biologists](#) contains articles on many of the points above.*

### Software and code

Policy information about [availability of computer code](#)

|                 |                                                                                                                                           |
|-----------------|-------------------------------------------------------------------------------------------------------------------------------------------|
| Data collection | Sequencing data collected by Illumina HiSeq4000 softwares.                                                                                |
| Data analysis   | Easeq1.02, HOMER v4.9.1, MACS v2.1.1.20160309, Bowtie v.2.3.1, Deseq2, R_Bioconductor v3.5.1_3.7, CellRangerv2.2, Summit (FACS analyses). |

For manuscripts utilizing custom algorithms or software that are central to the research but not yet described in published literature, software must be made available to editors/reviewers. We strongly encourage code deposition in a community repository (e.g. GitHub). See the Nature Research [guidelines for submitting code & software](#) for further information.

### Data

Policy information about [availability of data](#)

All manuscripts must include a [data availability statement](#). This statement should provide the following information, where applicable:

- Accession codes, unique identifiers, or web links for publicly available datasets
- A list of figures that have associated raw data
- A description of any restrictions on data availability

All the sequencing data generated in this work are deposited on GEO as GSE125671.

## Field-specific reporting

Please select the one below that is the best fit for your research. If you are not sure, read the appropriate sections before making your selection.

- Life sciences       Behavioural & social sciences       Ecological, evolutionary & environmental sciences

## Life sciences study design

All studies must disclose on these points even when the disclosure is negative.

|                 |                                                                                                                                                                                                                                                                                                                                                                                         |
|-----------------|-----------------------------------------------------------------------------------------------------------------------------------------------------------------------------------------------------------------------------------------------------------------------------------------------------------------------------------------------------------------------------------------|
| Sample size     | No statistical methods were used to predetermine sample size                                                                                                                                                                                                                                                                                                                            |
| Data exclusions | There was no exclusion/inclusion of samples or animals in the analysis                                                                                                                                                                                                                                                                                                                  |
| Replication     | FACS analyses of POMC-EGFP pituitary cells were performed on 5 WT and 3 KO replicates.<br>ATACseq on tissues of various genotypes were performed in duplicates (four lobes per replicate).<br>ATACseq on FACS-purified gonadotrope cells were performed once using 62 pituitaries.<br>ChIPseq experiments were performed once.<br>scRNAseq was performed using an adult male pituitary. |
| Randomization   | There was no randomization of experiments                                                                                                                                                                                                                                                                                                                                               |
| Blinding        | Investigators were not blinded during experiments and analysis. Genotyping was done before performing the experiments.                                                                                                                                                                                                                                                                  |

## Reporting for specific materials, systems and methods

We require information from authors about some types of materials, experimental systems and methods used in many studies. Here, indicate whether each material, system or method listed is relevant to your study. If you are not sure if a list item applies to your research, read the appropriate section before selecting a response.

### Materials & experimental systems

|                                     |                                                                 |
|-------------------------------------|-----------------------------------------------------------------|
| n/a                                 | Involved in the study                                           |
| <input type="checkbox"/>            | <input checked="" type="checkbox"/> Antibodies                  |
| <input type="checkbox"/>            | <input checked="" type="checkbox"/> Eukaryotic cell lines       |
| <input checked="" type="checkbox"/> | <input type="checkbox"/> Palaeontology                          |
| <input type="checkbox"/>            | <input checked="" type="checkbox"/> Animals and other organisms |
| <input checked="" type="checkbox"/> | <input type="checkbox"/> Human research participants            |
| <input checked="" type="checkbox"/> | <input type="checkbox"/> Clinical data                          |

### Methods

|                                     |                                                    |
|-------------------------------------|----------------------------------------------------|
| n/a                                 | Involved in the study                              |
| <input type="checkbox"/>            | <input checked="" type="checkbox"/> ChIP-seq       |
| <input type="checkbox"/>            | <input checked="" type="checkbox"/> Flow cytometry |
| <input checked="" type="checkbox"/> | <input type="checkbox"/> MRI-based neuroimaging    |

## Antibodies

|                 |                                                                                                                                                                                                                                                         |
|-----------------|---------------------------------------------------------------------------------------------------------------------------------------------------------------------------------------------------------------------------------------------------------|
| Antibodies used | Listed in ChIPseq section.                                                                                                                                                                                                                              |
| Validation      | <i>Describe the validation of each primary antibody for the species and application, noting any validation statements on the manufacturer's website, relevant citations, antibody profiles in online databases, or data provided in the manuscript.</i> |

## Eukaryotic cell lines

Policy information about [cell lines](#)

|                                                                      |                                                                                                                                                                                                                                                     |
|----------------------------------------------------------------------|-----------------------------------------------------------------------------------------------------------------------------------------------------------------------------------------------------------------------------------------------------|
| Cell line source(s)                                                  | AtT-20 cells obtained from the late E. Herbert in 1981 and maintained in this lab since.                                                                                                                                                            |
| Authentication                                                       | Cells were not authenticated by karyotyping but are routinely assessed for POMC expression and responsiveness to CRH and glucocorticoids, the hallmarks biological activities of corticotrope cells that constitute the basis for using this model. |
| Mycoplasma contamination                                             | Yes, on a yearly basis.                                                                                                                                                                                                                             |
| Commonly misidentified lines<br>(See <a href="#">ICLAC</a> register) | No commonly misidentified cell lines were used in this study.                                                                                                                                                                                       |

## Animals and other organisms

Policy information about [studies involving animals](#); [ARRIVE guidelines](#) recommended for reporting animal research

|                    |                                                                                                                                                |
|--------------------|------------------------------------------------------------------------------------------------------------------------------------------------|
| Laboratory animals | Stated in Online Methods, mouse strains used are WT or POMC-EGFP (C57Bl/6), and Pax7 <sup>-/-</sup> (129/sv) and Tpit <sup>-/-</sup> (Balb/c). |
| Wild animals       | Not used in this study.                                                                                                                        |

Field-collected samples

Not used in this study.

Ethics oversight

Animal studies were approved by the IRCM Animal Ethics Committee following Canadian regulations.

Note that full information on the approval of the study protocol must also be provided in the manuscript.

## ChIP-seq

### Data deposition

Confirm that both raw and final processed data have been deposited in a public database such as [GEO](#).

Confirm that you have deposited or provided access to graph files (e.g. BED files) for the called peaks.

Data access links

May remain private before publication.

GEO GSE125671

Files in database submission

(1) GSE125668: Pioneer and nonpioneer factor cooperation drives lineage specific chromatin opening [ATAC-seq]  
 GSM3579919  
 ATACseq in purified anterior pituitary  
 GSM3579920  
 ATACseq in purified gonadotropes  
 GSM3579921  
 ATACseq in wild type intermediate pituitary rep1  
 GSM3579922  
 ATACseq in wild type intermediate pituitary rep2  
 GSM3579923  
 ATACseq in Pax7 Het;Tpit Het intermediate pituitary rep1  
 GSM3579924  
 ATACseq in Pax7 Het;Tpit Het intermediate pituitary rep2  
 GSM3579925  
 ATACseq in Pax7 Knockout intermediate pituitary rep1  
 GSM3579926  
 ATACseq in Pax7 Knockout intermediate pituitary rep2  
 GSM3579927  
 ATACseq in Tpit Knockout intermediate pituitary rep1  
 GSM3579928  
 ATACseq in Tpit Knockout intermediate pituitary rep2  
 GSM3579929  
 ATACseq in Pax7 and Tpit double Knockout intermediate pituitary rep1  
 GSM3579930  
 ATACseq in  $\alpha$ T3 cells expressing Neo  
 GSM3579931  
 ATACseq in  $\alpha$ T3 cells expressing Pax7  
 GSM3579932  
 ATACseq in AtT-20 cells expressing Neo replicate 1  
 GSM3579933  
 ATACseq in AtT-20 cells expressing Neo replicate 2  
 GSM3579934  
 ATACseq in AtT-20 cells expressing Pax7 replicate 1  
 GSM3579935  
 ATACseq in AtT-20 cells expressing Pax7 replicate 2

(2) GSE125669: Pioneer and nonpioneer factor cooperation drives lineage specific chromatin opening [ChIP-seq]  
 GSM3579936  
 Pax7 (Flag) ChIPseq in  $\alpha$ T3 cells expressing Pax7  
 GSM3579937  
 Flag (control) ChIPseq in  $\alpha$ T3 cells expressing Neo  
 GSM3579938  
 Input DNA in  $\alpha$ T3 cells expressing Pax7  
 GSM3579939  
 Input DNA in  $\alpha$ T3 cells expressing Neo  
 GSM3579940  
 Neurod1 ChIPseq in AtT-20 cells  
 GSM3579941  
 Sox2 ChIPseq in AtT-20 cells expressing Sox2

(3) GSE125670: Pioneer and nonpioneer factor cooperation drives lineage specific chromatin opening [scRNA-seq]  
 GSM3579942 Single cell RNAseq from adult male pituitary

Genome browser session  
(e.g. [UCSC](#))

N/A

## Methodology

### Replicates

ATACseq on tissues of various genotypes were performed in duplicates (four lobes per replicate).  
ATACseq on FACS-purified gonadotrope cells were performed once using 62 pituitaries.  
ChIPseq experiments were performed once.

### Sequencing depth

ATACseq in sorted gonadotropes: 45 641 768 reads PE50  
ATACseq in sorted anterior lobe : 56 366 675 reads PE50  
ATACseq in Pax7+;/+;Tpit+;/+ IL rep1: 27 878 000 reads PE125  
ATACseq in Pax7+;/+;Tpit+;/+ IL rep2: 27 219 724 reads PE125  
ATACseq in Pax7+;/-;Tpit+;/- IL rep1: 35 018 234 reads PE125  
ATACseq in Pax7+;/-;Tpit+;/- IL rep2: 76 601 522 reads PE125  
ATACseq in Pax7-;/-;Tpit+;/- IL rep1: 25 998 246 reads PE125  
ATACseq in Pax7-;/-;Tpit+;/- IL rep2: 59 145 908 reads PE125  
ATACseq in Pax7+;/-;Tpit-;/- IL rep1: 38 130 840 reads PE125  
ATACseq in Pax7+;/-;Tpit-;/- IL rep2: 61 087 617 reads PE125  
ATACseq in Pax7-;/-;Tpit-;/- IL rep1: 60 155 847 reads PE125  
ATAC in AtT-20 Neo rep1: 23 668 280 reads PE125  
ATAC in AtT-20 Neo rep: 31 075 766reads PE125  
ATAC in AtT-20 Pax7 rep1: 21 809 982 reads PE125  
ATAC in AtT-20 Pax7 rep2: 33 953 754 reads PE125  
ATAC in aT3 Neo rep1: 48 752 854reads PE50  
ATAC in aT3 Pax7 rep1: 58 172 820 reads PE50  
Sox2 ChIPseq in AtT-20: 59 166 753 reads PE50  
Neurod1 ChIPseq in AtT-20: 59 624 919 reads PE50  
Pax7 (Flag) ChIPseq in aT3 Pax7: 48 881 695 reads PE50  
Flag ChIPseq in aT3 Neo: 32 560 399 reads PE50

### Antibodies

Sox2: Ab59776 Abcam  
Flag: F3165 Sigma  
Neurod1: Poulin et al. 2000

### Peak calling parameters

Peaks were identified by comparing each sample to its input using MACS v2.1.1.20160309 callpeak function using the parameters: --bw 250 -g mm --mfold 10 30 -p 1e-5.

### Data quality

ATACseq in sorted gonadotropes: 66 140 peaks with pvalue<0.00005 and 46 554 with Fold >5  
ATACseq in sorted anterior lobe : 59 116 peaks with pvalue<0.00005 and 37 383 with Fold >5  
ATACseq in Pax7+;/+;Tpit+;/+ IL rep1: 39 025 peaks with pvalue<0.00005 and 36 014 with Fold >5  
ATACseq in Pax7+;/+;Tpit+;/+ IL rep2: 49 348 peaks with pvalue<0.00005 and 45 851with Fold >5  
ATACseq in Pax7+;/-;Tpit+;/- IL rep1: 55 466 peaks with pvalue<0.00005 and 50 318 with Fold >5  
ATACseq in Pax7+;/-;Tpit+;/- IL rep2: 70 135 peaks with pvalue<0.00005 and 47 496 with Fold >5  
ATACseq in Pax7-;/-;Tpit+;/- IL rep1: 21 028 peaks with pvalue<0.00005 and 17 847 with Fold >5  
ATACseq in Pax7-;/-;Tpit+;/- IL rep2: 52 126 peaks with pvalue<0.00005 and 35 143 with Fold >5  
ATACseq in Pax7+;/-;Tpit-;/- IL rep1: 33 895 peaks with pvalue<0.00005 and 25 732 with Fold >5  
ATACseq in Pax7+;/-;Tpit-;/- IL rep2: 56 822 peaks with pvalue<0.00005 and 37 050 with Fold >5  
ATACseq in Pax7-;/-;Tpit-;/- IL rep1: 46 388 peaks with pvalue<0.00005 and 31 209 with Fold >5  
ATAC in aT3 Neo rep1: 59 161 peaks with pvalue<0.00005 and 47 818 with Fold >5  
ATAC in aT3 Pax7 rep1: 68 732 peaks with pvalue<0.00005 and 49 254 with Fold >5  
Sox2 ChIPseq in AtT-20: 57 762 peaks with pvalue<0.00005 and 38 099 with Fold >5  
Neurod1 ChIPseq in AtT-20: 102 688 peaks with pvalue<0.00005 and 74 774 with Fold >5  
Pax7 (Flag) ChIPseq in aT3 Pax7: 68 410 peaks with pvalue<0.00005 and 42 192 with Fold >5

### Software

Easeq1.02, HOMER v4.9.1, MACS v2.1.1.20160309, Bowtie v.2.3.1, Deseq2, R\_Bioconductor v3.5.1\_3.7

## Flow Cytometry

### Plots

Confirm that:

- The axis labels state the marker and fluorochrome used (e.g. CD4-FITC).
- The axis scales are clearly visible. Include numbers along axes only for bottom left plot of group (a 'group' is an analysis of identical markers).
- All plots are contour plots with outliers or pseudocolor plots.
- A numerical value for number of cells or percentage (with statistics) is provided.

## Methodology

### Sample preparation

62 anterior lobe from pituitary of Tg(LH-Cerulean) mice were dissociated (as described in methods) and sorted based on Cerulean signal for the purification of Pituitary lineages.

|                           |                                                                                                                                                                                            |
|---------------------------|--------------------------------------------------------------------------------------------------------------------------------------------------------------------------------------------|
|                           | Single anterior or intermediate lobe of Tg(POMC-EGFP);Pax7+/- or Tg(POMC-EGFP);Pax7-/-were dissociated (as described in methods) for FACS analysis                                         |
| Instrument                | FACSAria (BD) was used for Purification of pituitary lineage<br>FACSCalibur (BD) was used for FACS analyses                                                                                |
| Software                  | Analysis of FACS data was performed using Summit                                                                                                                                           |
| Cell population abundance | Sorting was based on the Cerulean level that strongly marks gonadotropes in Tg(LH-Cerulean), the population of interest, WT mice were used to identify background level of Cerulean signal |
| Gating strategy           | FSC and SSC gates were set to avoid debris and doublets of cells. Cerulean signal was used to differentiate the gonadotropes and the non-gonadotrope cells of anterior pituitaries         |

Tick this box to confirm that a figure exemplifying the gating strategy is provided in the Supplementary Information.
